# Supplementary material
Source: Springer Nature journal article supplement (https://www.springermedizin.de/resource/supplementary/12904_2009_60_MOESM2_ESM.pdf/9518060)

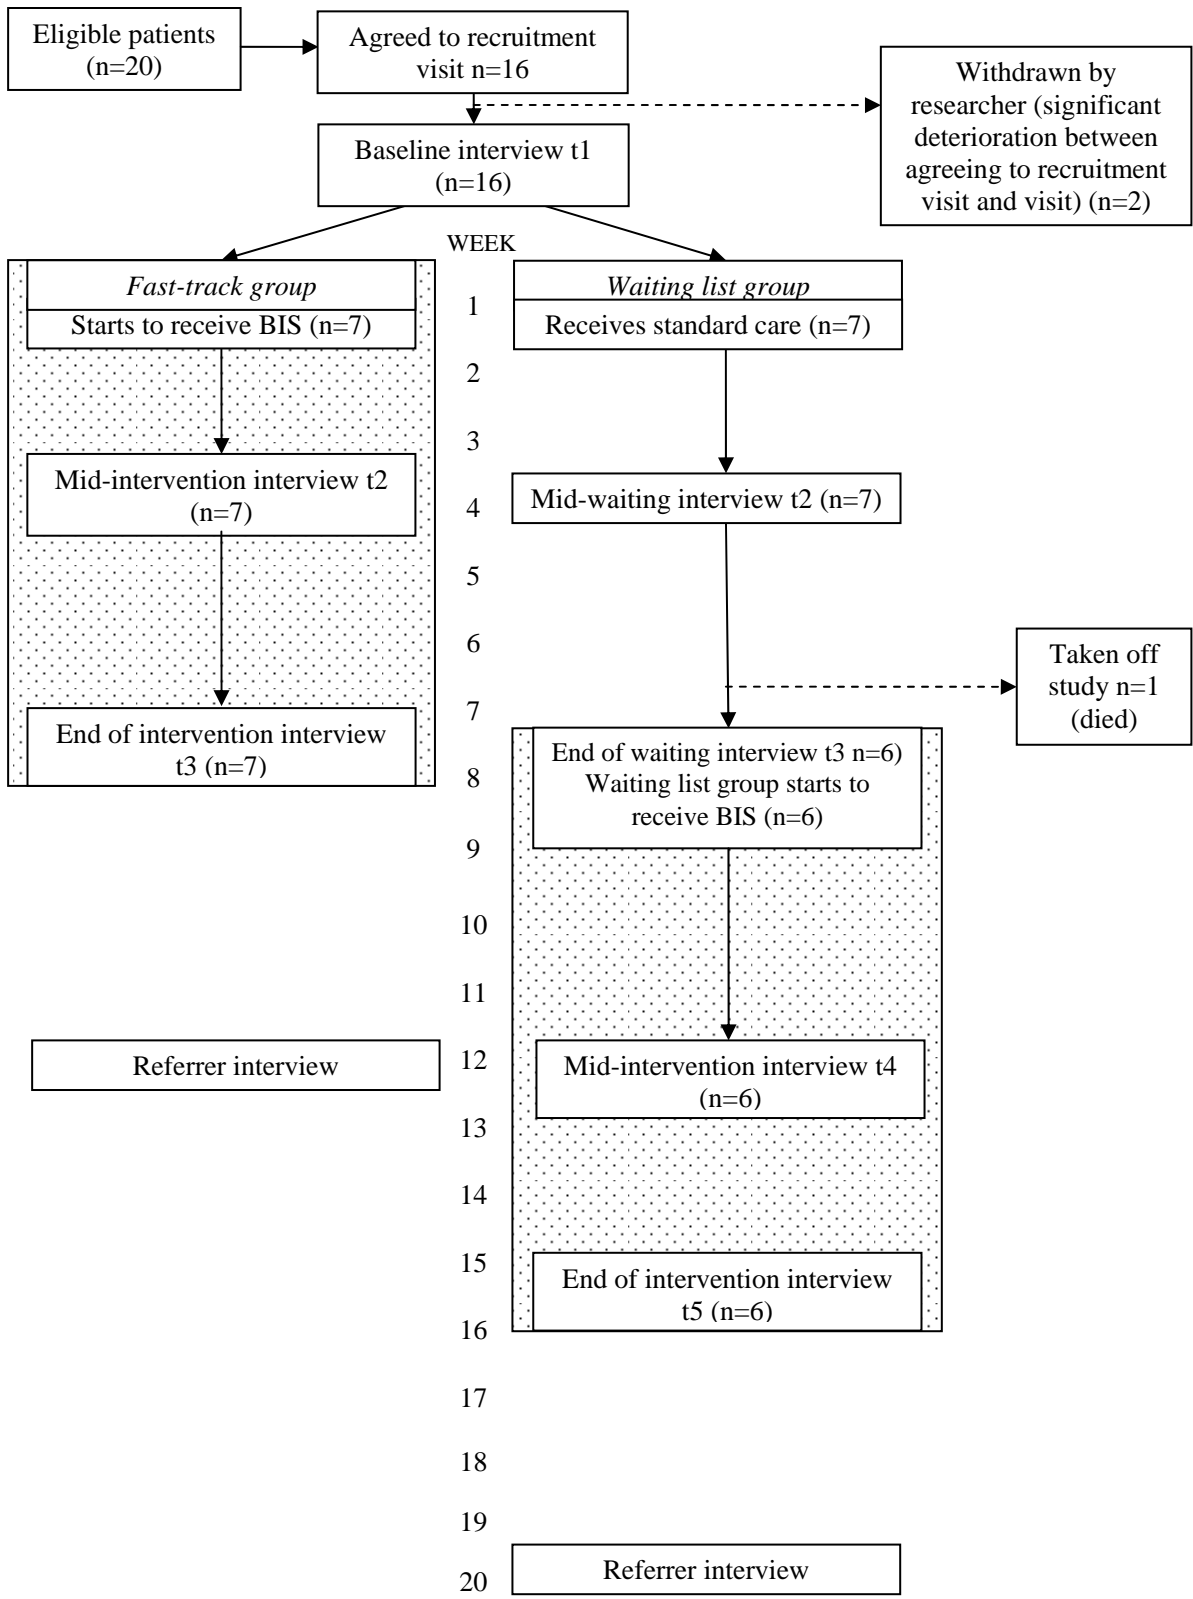

 = intervention

Supplement: MOESM2 [file 9518060]
